# Supplementary material for: Application of a Multiplex Quantitative PCR to Assess Prevalence and Intensity Of Intestinal Parasite Infections in a Controlled Clinical Trial
Source: PLoS Negl Trop Dis. 2016 Jan 28;10(1):e0004380. doi: 10.1371/journal.pntd.0004380 (PMC4731196; doi:10.1371/journal.pntd.0004380)
Supplement: S1 Dataset — (XLSX) [file pntd.0004380.s004.xlsx]

## Sheet: Timor
	PCR																		Microscopy
Name	Necator		Ascaris		Ancylostoma		EHV		Giardia		Entamoeba	Cryptosporidium		Strongyloides		Trichuris	EHV		M_Gia	M_asc	M_Hook	M_Ent	M_cry	M_Strongy
Dat 01-01							16.75	16.3									17.4	17.37	0	0	0
Dat 01-03	31.46	31.51					17.77	17.91	20.92	21.09							17.99	17.8	1	0	0
Dat 01-04			24.55	24.68			18.32	17.96									18.49	18.48	0	3	0
Dat 01-05							16.24	16.48	22.61	22.57							17.21	17.02	0	0	0
Dat 01-06			16.31	16.08			16.69	17.93	26.21	26.33							18.2	18.03	0	14	0
Dat 02-01	18.44	18.68	17.36	17.27			19.17	18.9									19.83	19.86	0	23	0
Dat 02-02	18.51	18.63	24.77	24.01			20.51	20.54									21.32	21.45	0	28	1
Dat 02-03							21.68	21.65									22.79	22.87	0	0	0
Dat 02-05	19.3	19.23	15.89	16.14			17.12	17.08									17.38	16.77	0	52	1
Dat 02-06	29.81	32.6	13.15	12.55			17.86	17.35									17.87	17.95	0	35	0
Dat 02-07	19.1	18.8	21.33	20.84			18.28	18.41	19.62	19.36							18.68	19.23	1	12	0
Dat 02-08	21.02	21.03	13.36	13.49	23.34	23.16	17.22	17.26	21.84	22.25							17.94	18.07	0	0	0
Dat 03-02	19.99	20.16					17.61	17.92									18.44	18.28	0	0	0
Dat 03-04	24.15	24.19					21.2	21.03									22.9	22.56	0	0	0
Dat 03-05	23.33	23.47	12.82	12.83	25.53	25.43	18.06	18.25									18.21	18.32	0	25	0
Dat 04-01	16.49	16.51	15.33	15.45			16.83	16.73									18.07	17.86	0	24	0
Dat 04-02	18.29	17.96	14.27	13.97	22.36	22.14	16.7	16.97									18	17.96	0	23	0
Dat 04-03	24.05	24.21	19.03	19.22			17.26	17.47									18.82	19.75	0	0	0
Dat 04-04	20.94	20.54	15.19	15.28			18.25	18.16									18.79	19.27	0	57	1
Dat 04-05	21.36	21.47					18	18.3									18.67	18.74	0	0	0
Dat 04-06	18.63	18.53					17.58	17.38									17.89	17.94	0	0	0
Dat 04-07	23.53	23.4	14.92	14.88			18.8	18.89	28.23	28.11							19.56	19.9	0	17	0
Dat 06-01	20.3	20.32					18.15	18.28									18.81	18.78	0	0	0
Dat 06-02	22.25	22.47					19.17	19.89									20.63	20.7	0	0	0
Dat 06-05	31.23	30.66					17.8	18.38									18.7	18.53	0	0	1
Dat 07-01	19.55	19.51					18.52	18.67	21.24	20.79							19.6	18.95	1	0	1
Dat 07-02	16.15	16.49					17.2	17.42	23.17	23.65							18.15	18.38	0	10	0
Dat 07-03	23.49	23.71	14.06	14.41			16.33	16.62									17.13	17.18	0	24	0
Dat 08-01	18.55	18.46					17.84	17.69									20.27	21.29	0	12	0
Dat 08-04	30.57	30.52					17.96	17.82									18.5	18.06	0	0	0
Dat 08-05							16.86	16.78									17.9	17.65	0	0	0
Dat 09-01	18.27	18.23					18.19	18.25									18.58	18.76	0	0	0
Dat 09-02							18.46	18.81									19.88	19.44	0	0	0
Dat 10-01	25.79	25.79					16.41	16.49									18.25	18.34	0	0	0
Dat 11-01	20.55	20.78			20.36	20.22	18.61	19.06									19.25	19.34	0	0	0
Dat 11-02	20.09	20.13					17.57	17.45									17.29	17.23	0	0	0
Dat 11-03							18.34	18.26									18.68	18.98	0	0	0
Dat 11-04	27.14	27.06	23.93	24.27			19.33	18.88									19.86	19.44	0	0	0
Dat 12-01							16.87	16.56									17.62	17.83	0	0	0
Dat 12-02							18.64	18.5									19.29	18.73	0	0	0
Dat 13-01	25.71	25.96					16.36	16.43									17.29	17.83	0	0	0
Dat 13-02							20.8	20.88									22.58	22.78	0	0	0
Dat 13-03	17.68	17.8	15.05	15.19			18.77	18.4									19.4	19.36	0	55	0
Dat 13-04			12.87	12.84			17.08	17.47									18.31	18.75	0	95	0
Dat 13-05	22.13	22.27	23.65	23.59			18.01	18.38									19.33	19.61	0	35	0
Dat 13-06					24.95	24.79	16.09	16.22									16.66	16.63	0	0	0
Dat 14-01	19.25	19.43					17.89	17.99									17.9	17.48	0	0	0
Dat 15-02							19.62	19.57	21	21.08							19.72	19.89	1	0	0
Dat 15-03							17.36	17.2	20.02	19.84							17.44	17.63	1	0	0
Dat 16-05	21.39	21.29	21.37	20.84			17.48	17.31	20.82	20.74							18.64	18.41	0	15	7
Dat 17-01	22.01	22.24					17.72	18.08									19.02	18.5	0	0	0
Dat 17-02			15	14.85			18.44	17.78	29.83	28.44							18.57	18.87	0	43	0
Dat 17-04	30.41	30.83	17.22	16.84			17.78	17.21									18.22	18.11	0	25	0
Dat 17-06			31.01	29.55			18.3	18.44									18.39	18	0	3	0
Dat 18-01	22.11	22.19					19.33	19.9									20.23	20.34	1	0	0
Dat 18-02	21.16	21.21	29.53	29.72			16.86	16.71									18.31	18.15	0	0	0
Dat 18-03	20.62	20.43					18.69	18.33									18.9	18.96	1	0	0
Dat 18-04	27.21	26.24					19.21	19.43									19.93	19.79	0	0	0
Dat 18-06	22.18	22.5					17.51	17.39									18.49	18.76	0	0	0
Dat 19-02	31.41	30.75					18.27	17.42									18.39	18.3	0	0	1
Dat 20-01	18.6	18.72	30.12	29.24			17.72	17.46									18.27	18.11	0	0	0
Dat 20-03							16.82	16.91									17.61	17.67	0	0	0
Dat 21-01	18.44	18.53					19.19	19.51									19.92	20.02	0	0	0
Dat 21-03	24.05	23.94					22.27	22.33	25.57	25.07							22.33	20.9	0	0	0
Dat 26-01	21.28	21.47					18.24	18.39									18.47	18.5	0	0	0
Dat 26-02	19.69	19.64	18.72	18.42			17.75	17.87									18.16	18.14	0	5	0
Dat 26-06			29.9	31.6			23.02	22.9									23.58	23.65	0	0	0
Dat 26-07	21.57	21.6	30.28	29.97			16.51	16.61									17.08	17.11	0	0	0
Dat 27-01							19.98	19.74									20.47	20.59	0	0	0
Dat 27-04			15.01	14.9			18.49	18.42	20.75	20.61							19.14	19.39	1	11	0
Dat 28-01			31.41	29.84			18.27	18.39									19.23	19.22	0	0	0
Dat 28-03							19.39	19.56	27.06	26.48							19.57	19.64	0	0	0
Dat 29-01			20.45	20.47			18.74	18.79									19.68	19.78	0	62	0
Dat 29-02			31.69	31.24			18.9	19.01	19.96	19.38							19.71		0	0	0
Dat 29-04	20.65	20.62	30.51	31.83			18.58	18.61									19.48	19.34	1	0	0
Dat 31-02			13.63	13.66			16.36	16.68									18.05	17.92	0	42	0
Dat 31-03	22.88	22.98	14.77	14.89			16.99	16.95	18.55	18.25				27.08	27.38		18.05	17.8	1	3	0
Dat 31-04							19.02	18.92									19.71	19.86	0	0	0
Dat 31-05	23.52	23.66					18.31	18.3									18.29	18.31	0	0	0
Dat 32-04							18.47	18.36									19	19.16	0	0	0
Dat 34-01	15.84	15.84	15.68	15.37			18.43	17.86									18.94	19.15	0	25	3
Dat 34-05			15.98	15.89			17.44	17.51									17.61	17.53	0	4	0
Dat 36-04	25.11	25.13					17.52	17.72									18.06	18.17	0	0	1
Dat 36-05	22.87	22.97					20.02	19.68									20.26	20.54	0	1	0
Dat 36-06	20.82	21.18					17.49	17.55	23.51	23.41							17.98	18.14	1	0	0
Dat 36-08			13.52	13.78			17.87	17.76	26.52	24.6							18.53	18.29	1	69	0
Dat 37-02	31.67	32.82	14.16	14.4			18.34	18.72									19.61	19.58	0	125	0
Dat 38-01	24.03	23.65					18.19	18.13	19.87	19.89							18.48	18.26	1	0	0
Dat 38-02							18.61	18.43	18.13	17.93							19.38	18.81	1	0	0
Dat 38-03			26.77	25.81			16.68	17.23	21.68	22.03							17.57	17.65	0	9	0
Dat 39-02	22.48	22.37					16.13	16.39									17.3	16.95	0	0	0
Dat 39-03	23.75	24.03					18.95	19.15									19.86	20.04	0	3	0
Dat 41-01	20	20.06			22.71	23.1	18.52	18.67									19	19.31	0	0	0
Dat 42-01	29.19	29.81					16.87	16.67	20.12	19.12							21.26	20.82	0	0	0
Dat 42-02	25.32	25.49					17.51	17.74									18.08	17.99	1	0	0
Dat 42-03	20.99	21.09					20.75	20.77									20.81	21.46	0	0	0
Dar 01-03	22.32	22.19	15.27	15.14			18.78	18.84									19.34	18.72	0	5	0
Dar - 01 - 04			12.49	12.45			18.24	18.73									17.5	18.66	0	67	0
Dar - 02 - 01	24.21	24.28	30.23	30.16			20.64	20.74									19	18.62	0	1	0
Dar 02-02	21.83	22.11	14.08	14.12	22.92	23.12	17.7	17.88									18.32	18.51	0	8	2
Dar - 02 - 03	23.39	23.08	13.06	13.27			17.93	18.34									17.23	18.04	0	4	0
Dar - 02 - 05			14.64	14.87			21.37	21.53									22.23	22.6	0	16	0
Dar - 02- 06	24.24	24.73	14.04	14.24			17.33	17.4	25.66	25.45							17.85	17.89	0	6	0
Dar - 03 - 01	29.84	32.55	12.98	13.36			17.89	17.76									18.42	18.41	0	42	0
Dar - 03- 03	24.55	25.05	20.93	20.98			19.98	19.85									21.69	21.78	0	430	0
Dar - 03 - 04	23.94	23.33	15.38	15.71			18.21	18.57									18.22	17.99	0	11	0
Dar - 03 - 05	20.48	21.29	13.71	14.27			18.8	19.51									18.59	18.75	0	2	0
Dar - 03 - 06	21.2	21.57	9.22	9.69			20.26	20.33									19.41	20.61	0	389	0
Dar - 03 - 08	24.61	25.05	13.82	14.11			20.32	20.21									18.17	18.59	0	13	1
Dar - 03 - 09	22.1	22.04	22.92	22.25			21.05	20.18									20.75	20.74	0	1	0
Dar - 03 - 10							17.44	17.33	24.24	24.44							17.42	17.78	2	0	0
Dar - 03 - 11			11.16	10.93			17.98	17.47	24.6	24.85							17.99	17.99	0	21	0
Dar - 04 - 02	24.17	24.33					19.71	19.78									19.53	20.12	0	0	0
Dar - 04 - 03	24.87	25.46	11.72	11.92			18.51	18.12									18.65	18.7	0	85	0
Dar - 04 - 04							18.65	19.14									19.39	18.83	0	0	0
Dar - 04 - 05	25.19	25.94	15.83	16.34			22.42	22.92	23.55	24.41							20.95	21.4	1	0	0
Dar 04-06	24.91	24.79	12.12	11.99	27.49	27.34	17.52	18.33									17.29	17.83	0	3	0
Dar - 05 - 01	22.2	22.16	14.9	14.54			16.62	16.42	25.23	24.68							17.82	17.51	0	2	0
Dar - 06 - 01	22.35	22.41					17.49	17.7									17.53	17.6	0	16	7
Dar - 06 - 02	21.76	22.4	13.95	14.2			18.45	19.17	19.09	15.91							18.07	15.93	0	7	0
Dar - 08 - 01	19.58	19.65	15.26	15.43			20.01	20.26									20.51	20.08	0	12	0
Dar - 09 - 01	17.11	17.27					20.46	20.44	23.23	23.28							20.33	20.6	2	0	2
Dar - 09 - 03							16.79	16.9									17.07	17.43	0	0	0
Dar 09-04	21.43	19.83	27.6	27.76			18.56	18.38									18.88	18.7	0	0	0
Foe - 01 - 01	19.85	19.97					18.55	19.05									19.61	19.73	0	0	38
Foe - 01 - 02	24.02	24.35	21.12	20.93			18.77	19.01									17.64	18.77	0	0	25
Foe - 01 - 03	19	19.32	13.05	12.8			19.77	19.65									17.53	18.38	0	0	0
Foe - 01 - 04	23.68	23.61					18.02	17.78									18.72	18.47	0	0	0
Foe - 01 - 05							17.57	18.26									18.62	19.01	0	2	6
Foe - 01 - 06	20.45	21.69	30.1	30.38			20.01	20.46									18.19	19.11	0	57	0
Foe - 01 - 07	26.07	25.88	24.64	24.46			19.16	19.63									19.15	19.14	0	0	0
Foe - 01 - 08	23.5	23.47					19.09	18.73									18.81	18.58	0	0	0
Foe - 01 - 09							18.83	18.31									18.14	18.26	0	0	0
Foe - 02- 01	21.54	22.57	12.09	12.27			18.38	19.41									18.49	18.65	0	75	0
Foe - 02 - 02	18.45	18.49	13.8	14.05			19.98	20.07									19.81	19.03	0	35	0
Foe - 02- 03	23.64	23.79	13.9	14.13			20.93	20.78									19.37	18.76	0	25	0
Foe - 02 - 04	20.06	20.05	8.6	8.5			16.06	16.6									17.43	17.06	0	122	0
Foe - 02- 05	25.66	25.29	11.46	11.27			18.27	18.1									19.5	19.53	0	225	0
Foe - 03 - 01	20.98	20.98	15.92	15.61			20.8	20.95									19.67	19.8	0	55	18
Foe - 03 - 02	29.31	29.54	14.52	14.21			16.47	16.15									17.03	17.35	0	22	0
Foe - 03 - 03	23.44	23.89					19.1	19.07	25.53	25.86							19.34	19.43	0	0	0
Foe - 03 - 04	20.16	20.12					16.05	16.18									15.95	16.35	0	1	2
Foe - 04 - 01	27.12	27.39					21.64	21.35									21.85	22.16	0	0	0
Foe - 04 - 02			28.9	27.64			20.04	20.22									19.53	19.7	0	0	0
Foe - 04 - 03			26.45	25.81			19.67	19.37	25.68	25.12							30.55	26.75	0	0	0
Foe - 04 - 04	23.49	24.39	18.34	18.67			20.84	21.52									19.79	19.67	0	8	0
Foe - 04 - 05	30.47	31.21	20.48	20.13			19.9	19.42									20.57	20.12	0	55	0
Foe - 04 - 06			11.65	11.53			17.44	17.31									18.5	18.5	0	7	0
Foe - 04 - 07			27.67	26.85			16.5	16.03									17.12	16.8	0	0	0
Foe - 05 - 01	21.24	21.29	31.01	29.81			20.98	20.98									19.51	19.55	0	0	0
Foe - 05 - 02	18.09	20.25	16.4	17.94			20.68	21.61									18.86	19.15	0	6	5
Foe - 05 - 03	20.79	21	11.87	12.16			17.96	18.09									19.01	18.93	0	0	0
Foe - 05 - 04	23.68	23.93					19.65	19.66									18.89	19.39	0	0	0
Foe - 05 - 05	19.01	19.08	12.49	12.3			20.69	20.47									23.34	20.9	0	75	0
Foe - 05 - 06			13.98	13.57			17.99	17.75									18.43	18.74	0	168	0
Foe-06-01	24.08	23.98	19.82	19.81			18.19	18.52									20.22	20.02	0	3	0
Foe - 06 - 03	16.47	16.56	14.44	14.78			19.76	19.86									18.71	18.88	1	0	45
Foe - 06 - 04	23.82	23.68	10.84	11.18			18.67	18.95									19.07	19.08	0	87	0
Foe - 06 - 05	23.58	23.39	10.87	10.3			19.03	18.92									19.25	19.05	0	85	0
Foe - 06 - 06	19.17	19.12	8.92	9.16			16.26	16.29	28.67	28.4							17.77	17.45	1	322	2
Foe - 06 - 07	24.68	24.59	12.59	12.4			17.48	17.23									17.91	18.39	0	22	0
Foe - 06 - 08	27.31	26.71	21.84	22.13			23.5	23.57									24.92	24.85	1	0	0
Foe - 06 - 09	23.31	23.11	11.43	11.45			19.16	18.95									18.89	19.17	0	275	0
Foe - 06 - 10			12.7	12.66			19.62	18.93									20.57	20.02	0	175	0
Foe - 07 - 01			15.52	15.44	25.57	25.62	22.44	21.9									20.94	21.21	0	10	0
Foe - 08 - 03	16.43	16.38	23.37	22.71	20.87	20.71	18.02	17.79	27.95	28.41							18.42	18.19	0	37	47
Foe - 08 - 04	20.89	20.87	13.34	13.13			18.44	18.31									19.15	18.82	0	0	0
Foe - 08 - 05	17.43	17.48	16.31	16.21	24.97	25.07	16.88	17.14									18.61	18.8	0	0	0
Foe - 08 - 06	28.87	28.88	15.63	15.6			20.63	20.75	27.06	27.35							19.56	19.49	0	0	0
Foe-08-07	20.89	20.83	28.84	28.92			17.4	17.9	24.17	24.18							18.11	18.14	0	0	0
Foe - 09 - 01	26.28	25.49	13.96	13.75			18.41	17.04									18.45	17.61	0	28	0
Foe - 09 - 03	19.74	19.78	12.5	12.37			19.52	19.83									18.64	18.99	0	64	13
Foe - 09 - 04	18.7	18.73	11.73	11.94			16.86	17.25									17.25	17.55	0	16	2
Foe - 09 - 05	22.52	22.19					17.79	18.22	25.16	25.26							18.05	18.46	1	0	0
Fal 01-01	32.41	35.11					21.04	21.18									21.52	21.34	0	0	0
Fal 01-02	30.22	30.27	16.65	17.07			19.02	19.35									15.57	17.05	0	54	0
FAL 01-03	19.2	19.36	11.58	11.61	21.92	22.22	17.39	17.87									18.52	18.21	0	0	0
Fal 02-01	23.65	21.8					18.22	18.1									18.81	18.95	0	0	3
Fal 02-02	25.28	24.76					18.53	19.07									19.36	18.95	0	0	0
Fal 02-05	19.58	19.64	30.04	30.29			20.7	20.88	21.23	21.83							21.18	21.56	0	4	0
Fal 03-01	24.78	24.82					19.41	19.94									18.5	19.3	0	0	1
Fal 03-02			13.94	13.76			19.16	18.88									18.54	19	0	2	0
Fal 03-03	19.58	19.36	13.47	13.57			18.24	18.31	20.5	20.82							18.97	19.35	0	55	0
FAL 03-05	19.34	19.3	11.48	11.34			16.75	16.81									17.41	17.79	0	65	42
Fal 03-06	24.49	24.15					17.07	17.17									18.06	17.84	0	70	0
Fal 03-07	19.64	19.55	17.55	17.74	22.24	22.16	20.34	20.26									19.77	19.9	0	47	0
Fal 03-08	28.48	29.67	29.88	29.42			17.04	17.04	23.84	23.7							17.73	17.92	0	10	0
Fal 04-03	20.3	20.65	15.18	15.14			17.87	18.18	24.3	24.39							18.73	19.08	0	8	0
Fal 05-01							18	18.24									19.02	19.22	0	0	0
Fal 05-02	21.8	22.02	24.77	24.41			19.57	19.73									18.52	20.45	0	0	0
Fal 05-03	20.35	20.75			23.58	23.77	21.36	21.69									21.06	21.27	0	0	0
Fal 05-04	19.75	20.02					16.4	16.55									16.6	16.76	0	0	4
Fal 05-05	27.12	26.26					17.51	17.39									17.07	17.12	0	0	1
Fal 05-06	23.14	24.12	25.77	25.77			20.38	20.32									20.38	20.66	0	33	0
Fal 05-07	18.4	18.51	24.94	26.08			17.58	17.94	20.62	20.74							18.87	18.85	0	18	3
Fal 05-08	19.52	20.02					19.14	19.5									19.03	19.28	0	0	0
Fal 06-02	20.12	20.33					16.63	16.66									17.41	17.65	0	2	0
Fal 06-03			29.54	28.86			21.31	21.72									22.39	22.11	0	0	0
Fal 07-01	16.04	16.01			20.41	20.47	17.48	17.77									17.87	18.06	0	0	0
Fal 07-04	16.34	16.44					18.01	18.27									17.76	17.9	0	0	0
Fal 08-01	26.25	26.42	28.66	29.07			25.21	25.52									26.8	27.27	0	0	0
Fal 08-07	20.44	20.92	16.83	16.97			18.92	19.01									19.08	19.42	0	35	0
Fal 08-08	25.37	25.52	13.67	13.73			16.4	16.56									16.39	17.39	0	25	0
Fal 11-01	20.64	20.41					18.04	18.21									18.67	18.62	0	0	0
Fal 11-02	19.5	19.54	29.4	29.09			20.15	20.73									20.28	20.33	0	0	1
Fal 11-03	19.26	19.52					19.03	19.24									20.04	20.08	0	0	0
Fal 11-04	20.48	20.14			22.62	22.21	19.53	19.61									20.49	20.82	0	0	0
Fal 11-05	20.45	20.6					17.21	17.58									18.51	18.25	0	0	0
Fal 14-01	18.01	17.94	24.22	25.15			18.31	18.49									18.96	17.95	0	37	82
FAL 14-02	22.77	22.73					20.65	20.27									19.67	19.72	0	0	2
Fal 14-03	19	18.88					18.08	18.19									19.88	18.56	0	0	0
Fal 14-04	18.21	18.14					20.59	20.84	23.44	23.02							21.94	21.4	0	0	2
Fal 15-01	15.32	15.3	30.7	31.97			18.24	18.62									19	19.05	0	0	0
Fal 15-02	21.16	20.91					19.37	18.71									18.63	19.06	0	0	3
Fal 18-08	18.18	18.29	13.81	13.8			17.15	17.16	29.18	29.39							17.85	18.04	0	27	3
Fal 18-10	19.64	19.57	14.35	14.62			17.34	17.45									17.7	18.25	0	12	0
Fal 19-02	21.13	20.69					19.21	19.27									19.94	20.17	0	0	0
Fal 19-04	18.5	18.44	30.11	30.67			20.08	20.17									19.34	19.96	0	24	26
Fal 21-01	17.78	18.38					16.29	16.96									18.01	18.02	0	0	0
Fal 21-03	16.81	16.8	30.01	29.66			19.95	20.07	21.77	21.82							20.9	20.66	0	0	0
Fal 21-05	25.32	24.96	29.91	29.43			27.52	27.87	31.24	31.86							27.76	28.43	1	4	1
Fal 21-06	17.56	17.53					19.33	19.39	23.38	23.74							19.29	19.32	0	0	0
Fal 23-02	24.47	24.56	24.73	24.39			18.53	18.42									18.29	18.72	0	0	0
Fal 24-01			11.47	11.39			17.49	17.5									18.86	18.78	0	68	0
FAL 25-01	21.48	21.57					25.13	25.18									22.64	22.36	0	0	24
Fal 25-02	24.81	24.81					22.66	22.88									22.5	22.18	0	0	6
Lia 01-01	29.1	30.28					17.05	17.3									17.51	17.75	0	0	0
Lia 01-02			10.83	11.09			17.15	16.89									17.86	17.74	0	115	2
Lia 01-03	20.49	20.56	13.88	13.88			18.15	18.21	23.49	23.38							18.66	18.71	0	32	0
Lia 01-04			14.33	13.99			17.09	16.8									17.87	17.92	0	9	0
Lia 02-01	17.38	17.27			29.46	29.74	16.65	16.53									17.36	17.57	0	0	75
Lia 02-02	17.79	18.26					16.56	16.31									16.97	16.67	0	0	12
Lia 02-04	21.4	21.17					19.52	19.52									18.83	19.23	0	0	0
Lia 02-05	20.4	20.45					17.29	17.31									18.31	18.57	0	22	0
Lia 03-05							23.25	23.68									24.39	30.09	0	0	0
Lia 04-01	23.48	23.61					16.15	15.71									16.8	16.9	0	0	0
Lia 04-02	19.65	19.66					17.92	17.78									17.94	18.88	0	0	2
Lia 05-01	26.25	26.26					25.8	25.49									26.09	25.2	0	0	0
Lia 05-02	20.53	20.71					18	17.89									18.41	18.28	0	0	0
Lia 05-03	24.02	24.2					16.84	17.06									16.72	16.74	0	0	0
Lia 06-02	18.55	18.51					17.9	17.58									18.52	18.36	0	0	0
Lia 07-01	16.55	16.44					16.78	16.7									17.65	17.91	0	0	0
Lia 07-05	30.81	30.79					16.36	16.42									17.12	17.35	0	0	0
Lia 07-06	20.2	20.18					17.34	17.27									17.93	17.73	0	0	1
Lia 07-07	28.49	28.87					16.73	16.73									17.54	17.17	0	0	0
Lia 07-08	20.32	20.35					16.48	17.22									17.46	17.63	0	0	14
Lia 09-01	18.66	19.15					18.84	19.02	26.69	27.61							18.71	18.59	0	0	1
Lia 09-03	20.58	21.07					16.26	16.54									17.31	17.13	0	0	17
Lia 10-02							16.94	16.83									17.89	17.38	0	0	0
Lia 10-03	31.12	31.81					16.66	16.69	24.76	24.23							17.35	16.69	0	0	0
Lia 10-04	30.12	31.75	31.06	30.24	34.53	36.07	18.25	18.09									18.14	18.4	0	0	0
Lia 11-02	19.48	19.56					19.69	19.81									19.4	19.51	0	0	5
Lia 12-01	21.92	21.94					15.89	15.66									16.68	16.58	0	0	1
Lia 12-02	21.7	21.56					16.83	16.6	16.1	16.36							17.45	17.1	0	0	0
Lia 12-09							17.14	16.88									17.24	17.17	0	0	0
Lia 12-07							17.12	16.91	21.69	21.79							17.62	17.8	0	0	0
Lia 12-08	30.41	31.05					15.88	15.89									16.38	16.14	0	0	0
Lia 14-01	21.64	21.58			30.49	30.86	16.72	16.71									17.57	16.58	0	0	0
Lia 14-02	22.19	22.61					16.68	16.22									17.27	16.82	0	17	1
Lia 14-03	25.09	24.32					16.67	16.43									16.3	16.64	0	0	2
Lia 14-04	25.46	25.3	18.5	18.51			17.48	17.37									18.29	19.42	1	0	0
Lia 15-01	19.09	19.36					17.94	18.15									18.68	18.83	0	0	0
Lia 15-02	17.65	17.86					15.86	16.47									17.2	16.87	0	0	15
Lia 15-03	23.43	21.61					16.87	16.72									17.65	17.48	1	0	0
Lia 15-04	20.26	20.19					17.21	17.29									18.13	17.6	0	0	0
Lia 15-05	21.18	20.91					17.55	17.35									17.49	17.46	0	0	0
Lia 15-06	20.38	20.35					20.79	20.61									20.09	20.13	0	0	0
Lia 15-07	21.26	21.1			25.36	25.84	20.19	20.05									19.69	19.71	0	0	0
Lia 16-02	26.03	26.14					16.12	16.07									16.35	16.39	0	0	1
Lia 16-03	20.61	20.66					16.08	16.44									16.79	17	0	0	0
Lia 16-04							16.78	16.7									17.13	18.19	0	0	0
Lia 16-05	20.7	21.32					16.63	16.87									16.8	17.07	0	0	1
Lia 16-06	23.13	23.21					19.46	19.34									16.8	17.07	0	0	0
Lia 17-01	20.71	20.62					16.57	16.53									17.14	16.93	0	0	0
Lia 17-02	21.58	21.38					17.07	16.68									17.53	17.74	0	0	0
Lia 18-01	18.4	18.45					16.73	16.79									17.74	17.61	0	0	0
Lia 18-02	28.21	27.85					24.51	24.8									22.38	20.72	0	0	0
Lia 18-03	19.93	19.94	29.59	30.05			17.68	17.6									18.03	18.25	0	2	0
Lia 18-04	22.43	22.52					21.97	22.5									22.64	23.02	0	0	0
Lia 18-05	19.17	19.34					16.84	17.13									17.46	18	0	0	0
Lia 18-06	19.13	19.46					17.02	17.16									17.98	17.82	0	0	0
Lia 18-07	21.12	21.04					21.01	20.63									20.47	20.55	0	0	0
Lia 18-08	22	22.02	29.83	31.51			19.44	19.95									19.38	19.71	0	0	1
Lia 21-04	17.58	17.74	29.11	28.69			16.89	16.89				30.71	33.67				16.9	17.13	0	13	0
Lia 21-08							17.39	17.27									18.18	17.94	0	4	0
Lia 24-02	24.67	24.67			29.18	29.22	16.78	16.74									17.43	17.37	0	0	0
Les 01-01			30.77	29.4			19.01	18.83	29.63	31.54							18.52	18.65	0	15	4
Les 01-03	24.79	25.05	15.7	15.66			18.25	18.27									18.89	18.64	0	41	0
Les 01-04	24.23	24.13					18.73	18.73									18.5	18.68	0	2	1
LES 02-01	21.09	20.94					21.65	21.29									20.87	20.68	0	0	43
Les 03-02			18.13	18.03			16.97	17.15									17.96	17.72	0	0	0
Les 03-03			11.05	11.16			17.67	17.66									18.07	17.59	0	32	2
Les 03-04	31.89	33.14	23.53	22.7			20.07	19.22									20.35	20.55	0	2	1
Les 03-05			14.87	14.55			18.36	18									18.27	18.19	0	31	0
Les 03-06			10.37	9.66			16.8	16.76									17.33	17.52	0	30	2
Les 03-07			20.35	20.8			18.12	18.43									18.3	18.21	0	10	0
Les 04-02	24.36	24.29					21.14	21.31									21.69	21.7	0	2	0
Les 04-03			18.73	18.56			22.76	22.63									23.11	23.39	0	248	0
Les 04-04			21.37	21.01			22.33	22.18									22.06	21.75	0	6	0
Les 04-05			10.68	10.73			17.86	18	21.2	21.67							17.53	17.76	2	34	0
Les 06-04			16.71	17.56			19.31	19.55									20.01	20.09	0	9	0
Les 06-05			13.43	13.3	30.75	30.25	18.94	18.26	26.13	25.72							18.97	19.07	1	82	0
Les 07-03							17.74	17.54	30.08	32.98							18	20.34	0	0	0
Les 09-02	21.4	21.27	12.84	12.49			18.21	17.78									18.34	18.08	0	18	0
Les 09-03			16.36	16.26			18.77	19.07	23.08	23.27							19.43	19.23	2	5	0
Les 09-04							17.39	17.23									17.57	17.63	0	8	0
LES 09-05			13.7	13.72			18.2	18.48	23.17	23.18							19.47	19.43	0	42	0
Les 10-02	22.06	22.15	12.41	12.65			18.88	18.64									18.8	18.62	0	10	6
Les 10-03	31.37	30.81	18.33	18.54			22.24	21.95									23.01	22.89	0	12	25
Les 10-05			14.02	14.17			16.7	16.72									18.18	18.09	0	258	2
Les 10-06			12.73	12.66			16.36	16.35									17.49	17.53	0	3	0
Les 10-07	25.55	25.18	15.59	15.67			17.6	18.25									17.83	17.96	0	90	5
Les 10-08			13.74	13.61			18.87	18.41	26.39	27.32							18.57		1	12	0
Les 11-02	32.03	32.76					21.61	21.71									22.06	21.78	0	0	0
Les 11-03	26	26.03					21.03	20.87									21.76	21.33	0	0	2
Les 13-01	22.75	22.55	19.78	18.66			19.21	19									18.92	18.88	0	2	5
LES 13-02	19.45	19.32	14.65	14.4			19.88	19.5									20.43	20.32	0	7	11
Les 14-04	23.28	23.6	12.78	12.99			17.81	17.96									18.58	18.8	0	258	6
Les 15-01			30.42	30.53			19.05	18.8									20.27	19.75	0	12	1
Les 15-02	22.6	22.32					19.35	19.44									19.41	19.81	0	0	2
Les 15-03	23.6	23.65	17.42	17.88			19.1	19.19									18.89	19.57	0	15	6
LES 15-04			11.4	11.6			15.9	16.18									17.01	16.95	0	4	1
Les 15-05			23.17	22.93			22.5	22.38									22.72	22.75	0	23	0
Les 17-02	17.36	17.44	26.61	25.51			18.96	19.23									18.67	19.05	0	53	6
Les 17-05			9.78	9.84			17.77	17.69									18.48	18.05	0	125	0
Les 17-06			20.7	20.44			20.8	20.32									20.78	20.85	1	33	0
Les 19-02			17.34	17.27			18.47	18.54	23.34	23.49							18.73	19.07	0	4	0
Les 19-04							21.6	21.3									20.97	21.16	0	0	0
Les 19-05			15.82	15.52			17.33	17.48									17.27	17.45	0	86	0
Les 20-01	24.51	24.44	17.32	16.97			22.95	22.55									22.41	22.87	0	61	2
LES 20-02	19.04	19.22	26.32	26.11			18.83	19.29									20.09	20.11	0	4	18
Les 20-04	19.33	19.45					16.53	16.39	30.76	29.98							16.99	16.49	0	0	0
LES 23-01	23.95	24.03	12.75	13.1			17.86	17.78									18.04	18.44	0	11	2
Les 23-02	20.6	20.46	13.81	13.7			18.34	18.49									18.91	18.83	0	8	6
Les 23-04			19.26	19.72			19.01	19.34									18.88	19.34	0	6	0
Les 23-05			12.48	12.61			18.39	18.57									18.59	18.42	0	20	4
Les 23-06			18.82	18.1			20.47	19.9									21.87	21.43	0	18	0
Les 23-07	25.2	24.96	10.7	10.41			19.51	19.07									19.52	19.46	0	56	3
Les 26-02							20.62	20.53	23.87	23.18							21.34	21.71	2	2	0
Les 30-01	23.86	24.03	16.83	16.88			18.14	18.65									18.2	18.22	0	4	0
Les 30-02	21.88	22.13					20.1	19.9									20.66	20.58	0	0	2
Les 31-01	21.8	21.86	14.38	14.37			19.23	18.92									18.74	18.8	0	3	2
Les 31-02	24.32	24.33					18.22	18.55									17.09	17.95	0	0	0
LES 31-03			18.15	18.28			18.31	18.12									18.57	18.7	0	7	0
LES 33-01	21.47	21.61					19.44	19.36									19.83	19.88	0	0	0
LES 33-02	21.39	21.56	11.24	11.6			16.51	16.49									22.13	21.91	0	35	4
LES 33-03			20.11	23.67			22.93	25.99	26.87	27.07							21.72	21.47	2	11	0
Les 34-01	25.64	25.56					17.51	17.69									18.01	18.01	0	0	1
Les 34-02	19.11	19.15	16.41	16.57			17.87	18.19									19.38	19.79	0	8	10
Les 34-03			10.04	10.14			18.33	18.77									18.41	18.71	0	75	0
Man 01-01			29.58	30.37			18.63	18.97									18.63	19.11	0	0	0
Man 01-02			10.7	10.88			17.32	17.31									17.77	17.53	0	21	0
Man 01-04	21.32	21.36					19.1	19.15	30.64	30.61							18.72	18.8	0	0	0
Man 01-05	31.23	32.16	29.48	30.56			17.86	18.14									18.58	18.3	0	0	0
Man 01-06			16.08	15.88			20.17	19.94									20.04	19.93	0	59	0
Man 01-07			15	15.52			18.51	18.68									19.03	18.64	0	0	0
Man 01-08							17.34	17.31	29.69	29.43							17.76	17.55	0	0	0
Man 01-09							17.85	18.17									18.33	18.11	0	0	0
Man 02-01	21.55	21.35	22.52	22.17			19.79	19.72									18.95	19.27	0	61	0
Man 02-02	20.97	21	12.94	13.33			17.79	18.2									17.53	17.75	0	20	0
Man 02-03			19.16	19.02			16.65	16.64	33.73	34.88							16.65	16.7	0	0	0
Man 03-01	20.58	20.32	13.06	13.18	21.8	21.93	18.68	18.64									18.82	18.82	0	2	0
Man 03-02	20.47	20.53					18.79	18.72									19.84	20.17	0	0	0
Man 03-03	19.21	19.77	11.57	12.28			17.93	18.57									18.06	18.18	0	32	0
Man 03-04	23.19	23.46	17.97	17.84			19.17	19.03									20.43	20.67	0	0	0
Man 03-05			13.5	13.56			17.41	17.12									17.47	17.27	0	20	0
Man 04-02	21.52	21.83	15.35	14.97			19.87	19.92									20.1	20.71	0	19	0
Man 04-03	24.03	24.56	11.21	11.48			18.45	18.29									18.54	18.63	0	15	0
Man 04-04	33.87	33.14					20.54	21.04									20.69	20.93	0	0	0
Man 06-01	19.28	19.17	14.03	13.51			20.9	20.8									22.79	23.05	0	250	11
Man 06-02	30.36	28.97	21.2	21.11			19.51	19.45	34.87	33.6							18.11	18.3	0	4	0
Man 06-03	22.49	22.46	10.77	11.12			18.62	18.27									19.1	18.25	0	48	0
Man 06-05	21.9	22.37	11.7	11.7			18.65	18.42									17.82	18.52	0	16	0
Man 07-01							19.35	19.57	26.24	26.52							20.55	20.62	0	0	0
Man 07-02	20.17	20.14					18.55	18.31									18.63	18.66	0	0	0
MAN 08-01	19.17	18.98	14.28	14.52	24.31	24.57	17.16	16.93									17.81	18.07	0	2	14
MAN 08-02	23.56	23.29	19.51	19.42			22.03	21.82									22.56	22.42	0	76	1
Man 08-04	21.45	21.38	11.48	10.87			17.9	18.19	31.2	31							17.95	18.1	0	159	0
Man 08-05	29.24	30.67	14.41	14.43			17.67	17.15	23.36	23.37							16.82	17.45	0	20	0
Man 08-06							17.85	17.9	19.57	19.65							17.9	17.78	0	0	0
Man 08-07			29.75	30.19			18.49	18.08	22.26	22.8							17.59	17.95	0	0	0
Man 10-01	22.1	21.99	14.47	14.29			18.01	17.76									19.29	19.13	0	76	1
Man 10-04			29.49	31.61			17.77	18.63									18.23	18.53	0	0	0
Man 10-05	30.86	31.61	11.32	11.4			16.61	17.14									17.4	17.12	0	0	0
MAN 10-06							15.77	15.77									17.23	17.8	0	0	0
Man 11-01	17.35	17.33	11.72	11.92			18.45	17.89									17.92	18.05	0	10	0
Man 11-02	16.53	16.58	29.07	29.15			18.48	18.33									18.69	17.76	0	0	5
Man 11-03	19.55	19.86					18.5	18.71									18.76	18.45	0	0	0
Man 12-01	20.64	20.66	12.65	12.98			18.39	18.74									17.99	18.79	0	28	0
Man 12-02	20.37	20.24	9.4	9.52			18.29	18.29	25.84	25.94							18.09	18.22	0	82	1
Man 13-01	22.8	23	17.64	17.65			20.11	20.64									19.66	20.05	0	4	0
Man 13-02	17.51	17.63	13.67	13.75	21.9	22.46	18.59	18.7									18.4	18.45	0	50	2
Man 13-03	18.08	18.06	12.99	12.96			18.18	18.22									17.99	18.51	0	76	0
Man 13-04	21.21	21.22	26.29	26.61			16.96	17.29									17.57	17.52	0	0	0
man 14-03	29	29.27					18.22	18.13									17.72	17.84	0	0	0
Man 14-05	20.05	20.14	24.54	24.55			19.16	19.01									20.34	20.63	0	0	0
Man 14-06	19.19	19.42	13.98	14.37			18.49	18.9									18.43	18.63	0	19	0
Man 15-01							18.72	18.6									18.76	19.17	0	0	0
Man 15-02	27.33	27.73	19.72	19.89			20.02	20.06									20.46	20.39	0	98	0
Man 15-03	20.18	20.08	16.61	16.52	23.15	23.45	18.68	18.88									20.56	20.64	0	117	0
Man 15-04	19.68	19.71	12.39	12.1			18.16	18.13	24.02	24.11							17.97	18.41	0	69	0
Man 16-01	24.35	24.42	29.23	28.81			19.08	18.44									18.85	19.03	0	0	0
Man 16-03	20.91	21.04					18.71	18.72									18.36	18.49	0	0	0
Man 16-04	20.35	20.16					19.49	19.47									19.09	19.14	0	0	1
Man 16-05			24.8	25.16			18.22	18.39									17.79	18.34	0	73	0
Man 16-06			28.72	27.48			18.09	18.34									17.6	17.65	0	0	0
Man 16-07	35.25	34.28					19.45	18.87	26.47	26.05							18.72	18.92	0	0	0
Man 16-08	22.16	21.68	9.84	9.96			17.79	18.01	20.66	20.47							18.18	18.08	1	186	0
Man 16-09			9.59	10.33			16.49	16.89	30.11	30.08							16.7	16.51	0	12	0
Man 16-10	31.82	33	9.65	9.87			17.89	17.94									17.24	17.19	0	108	2
Man 17-01	17.35	17.47	14.08	14.41			18.54	18.69									18.66	18.37	0	18	0
Man 17-02	18.8	19.07					20.91	21.21									21.61	21.55	0	0	0
Man 17-04	29.25	29.66					18.89	18.6									18.87	18.68	0	0	0
Bat 01-01	18.28	18.21	18.29	18			20.64	20.29						24.91	25.42		21.13	21.32	0	2	0
Bat 01-02			26.83	26.53			18.84	18.92									18.47	18.71	0	0	0
Bat 02-01	21.63	21.79	13.6	13.78			17.05	16.8									17.06	17.01	0	0	0
Bat 02-02	20.2	20.2					18.22	18.17	21.47	21.88							18.15	18.24	0	0	0
Bat 02-03	23.2	23.37	27.05	27.34			19.91	20.28									19.96	20.62	0	0	0
Bat 02-04	20.43	20.21					22.61	22.27									22.27	22.22	0	1	0
Bat 02-05	16.53	16.47					19.23	19.11									18.62	18.61	0	3	0
Bat 03-02	19.31	19.37	13.33	13.56			17.14	17.33									17.29	17.52	21	0	0
Bat 03-03	21.87	22.17					20.39	20.86									20.47	20.62	0	0	0
Bat 04-01	20.15	20.37	30.67	32.16	25.75	25.47	16.48	16.7									16.6	16.81	2	0	0
Bat 04-02	33.09	33.32					18.58	18.56	22.26	22.67							18.15	18.55	0	0	0
Bat 04-03	28.44	29.2					18.8	18.91									20.52	20.81	0	0	0
Bat 05-01	20.35	20.51			24.91	25.5	18.63	18.94									18.83	18.38	0	1	0
Bat 05-02	18.23	18.52					21.72	22.08									21.92	19.61	0	10	0
Bat 05-03	17.44	17.39			24.14	24.24	18.01	17.94									17.83	18.12	0	2	0
Bat 06-01	19.34	19.44					17.75	17.81									17.44	17.26	0	0	0
Bat 06-03	24.45	24.12					20.71	20.54	24.96	24.94							20.39	20.79	0	2	0
Bat 06-04	22.41	22.17					18.01	17.93									18.18	18.25	0	0	0
Bat 07-01	17.32	17.27	13.29	13.01			17.53	17.6									17.53	17.35	22	12	0
Bat 07-02	20.69	20.69	10.75	10.65			18.62	18.41									19.21	18.3	35	12	1
Bat 07-03	24.01	23.94					21.69	22.25									21.88	22.53	0	7	0
Bat 07-04	16.71	16.53			20.35	19.92	18.31	18.33									18.01	18.51	0	0	0
Bat 07-05	18.34	18.6					18.03	18.02									17.57	17.96	0	0	0
Bat 07-06	27.43	27.75					17.75	17.88									18.28	18.08	0	0	0
Bat 07-07			30.91	30.1			19.94	20.11									20.31	20.33	0	0	0
BAT 08-01	17.26	17.36	27.82	27.02	24.42	24.54	19.12	19.72									18.36	18.01	2	2	0
Bat 08-04	22.59	22.91	18.74	18.58			23.6	23.21									23.76	23.61	15	0	0
Bat 09-01	19.67	19.49	16.46	16.66			21.46	20.89	25.57	25.42							21.46	21.39	46	1	0
Bat 09-07	18.5	18.7	11.15	11.46			18.3	18.92									19.54	19.34	0	1	0
Bat 09-08	18.01	18.13	12.44	12.43			18.25	18.16									17.93	17.99	69	10	0
Bat 10-01	20.39	20.27					17.79	18.19									18.28	17.84	0	4	0
Bat 10-02	18.49	18.02	31.43	30.72			18.45	17.92									18.49	18.19	0	0	0
Bat 10-03	24.41	24.97					17.46	17.89									17.53	17.08	0	0	0
Bat 10-04	18.3	18.44	19.29	19.48			19.29	19.48									19.75	19.45	2	3	0
Bat 10-05							18.31	18.56									17.78	18.12	0	0	0
Bat 11-01	15.8	16.27					17.61	17.92									17.96	18.14	57	13	0
Bat 11-02	18.47	18.49	27.71	28.19			19.41	19.35									19.08	19.84	0	0	0
Bat 11-07	18.34	18.44	21.84	21.73			18.82	19.12									19.2	19.7	0	0	0
Bat 11-08	15.15	14.9	11.44	11.41			17.72	17.46	27.23	27.6							17.62	17.76	30	9	0
Bat 12-02							18.54	18.45									18.14	18.25	0	0	0
Bat 12-04	19.63	19.45	10.57	10.59			18.57	18.16									16.92	17.03	30	15	0
Bat 12-05	22.15	21.64	17.18	16.49			18.51	18.2									17.48	17.9	0	0	0
Bat 12-06	23.25	23.13	12.94	12.65			18.88	18.47									19.32	19.26	30	0	0
Bat 12-07							17.68	18									17.94	18.37	0	0	0
Bat 12-08							19.1	19.2	28	27.46							18.63	18.53	0	0	0
Bat 13-01	17.65	17.61					19.57	19.47									19.66	19.82	0	3	0
Bat 13-02	18.32	18.61	14.46	14.54			18.16	18.29									18.65	18.4	0	0	1
Bat 13-03	16.38	16.45	12.4	12.83			17.74	17.96	21.71	21							18.12	17.73	62	0	0
Bat 16-02	20.4	20.57	17.05	16.91			19.84	19.75	29.49	28.78							19.77	19.29	0	0	0
Bat 16-05	18.57	18.64	11.84	12.38	30.34	31.83	17.69	17.93									17.79	18.26	10	0	0
Bat 16-06	18.29	18.2	13.25	13.44	22.04	21.82	18.62	18.45									18.27	18.75	116	4	0
Bat 16-07	15.61	15.41	28.87	28.81			21.03	21.07	22.18	21.89							21.11	21.27	9	6	0
Bat 18-01	22.94	22.89					23.21	22.9									23.48	23.26	9	1	0
Bat 18-03	18.46	18.3					21.07	20.76									21.31	21.3	0	0	0

## Sheet: Cambodia
	PCR																		Microscopy
	Ascaris		Necator		Ancylostoma		Trichuris		Entamoeba		Giardia		Cryptosporidium		Strongyloides		EHVControl		Strongyle EPG nano3	Trichuris	Strongyloides	Entamoeba	Giardia	Crypto
DO069-05			24.41	24.4													14.28	14.46	6
DO069-06			32.89	32.36													14.41	14.45	0
DO093-01																	15.46	15.02	0
DO093-02																	14.36	14.34	0
DO094-01			27.44	28.37													14.42	14.43	0
DO094-02																	14.23	14.23	0
DO094-03					20.04	20.35											14.3	14.3	40
DO095-01																	14.27	14.25	0
DO095-02			36.84	35.38													14.76	14.43	0
DO096-01																	14.39	14.32	0
DO096-02			25.03	25.17													14.38	14.38	80
DO096-03																	14.41	14.48	0
DO096-04			26.43	25.48													14.58	14.28	10
DO096-05			24.54	24.56													14.3	14.43	0
DO097-01																	14.9	14.43	0
DO097-02																	14.58	14.6	0
DO097-03																	14.88	14.9	0
DO097-04					32.49	32.5											14.91	14.83	8
DO097-05																	15.08	14.85	0
DO098-01																	14.36	14.36	0
DO098-02																	14.37	14.22	0
DO098-03											19.82	20.34					14.33	14.28	0				1
DO098-04											25.13	25.57					14.9	15.21	0
DO098-05											21.16	21.41					14.27	14.59	0				1
DO099-01			26.42	26.08													15.3	15.08	15
DO099-02																	15.13	15.26	0
DO100-01											35.35	20.86					27.84	14.45	0				1
DO101-02			24.51	24.43													14.4	14.37	32
DO101-03																	14.34	14.32	0
DO101-05			23.3	23.63													14.49	14.44	0
DO102-01																	14.38	14.78	0
DO103-01			31.82	31.89													14.38	14.46	0
DO103-02																	14.87	14.51	3
DO104-02			26.86	27.02	25.51	25.58											14.42	14.39	0
DO104-03					21.94	21.58											14.28	14.26	0
DO104-05			19.29	19.85							17.69	17.6					14.98	14.96	8				1
DO104-06			23.31	23.55													14.39	14.37	24
DO105-01																	14.46	14.54	0
DO105-02																	14.5	14.45	0
DO105-03			18.3	18.28													14.97	14.98	258
DO105-04			23.17	23.98	32.01	32.51											14.86	14.99	15
DO105-06					33.1	35.78											14.4	14.42	0
DO105-07			22.78	23													14.39	14.35	45
DO106-01					20.49	20.32											15.09	14.8	6
DO106-02																	14.43	14.83	0
DO106-03																	14.82	14.87	0
DO107-01			19.27	18.93													14.84	14.96	8
DO108-02											19.93	20.69					14.36	14.31	0				1
DO109-01																	14.18	14.19	0
DO109-02			26.53	26.44													14.5	14.41	6
DO109-03							32.81	34.66			19.23	19.26					14.56	14.54	0				1
DO110-01					23.54	23.89	33.09	33.34									14.5	14.47	0
DO110-02			29.2	29.42													14.46	14.56	0
DO110-03					25.48	25.59											14.36	14.34	6
DO110-04																	14.74	14.98	0
DO110-05																	14.35	14.52	0
DO110-06			22.49	22.2													15.03	14.93	36
DO111-01			24.18	24.19													15.13	15.1	10
DO111-02																	15.04	14.97	0
DO112-02					22.06	22.42											14.32	14.29	0
DO112-03																	14.51	14.46	0
DO113-01			26.23	26.48	25.2	25.28											15.02	15	40
DO113-04																	15.01	15.04	0
DO114-01			28.46	27.75													14.39	14.29	0
DO114-02																	14.94	14.91	0
DO114-03			25.04	24.87	23.99	24.05											14.6	14.46	0
DO114-04																	14.3	14.02	43
DO115-01																	14.92	15	0
DO115-02					21.72	21.86											15.33	15.32	44
DO117-01					22.54	22.41											14.72	14.54	8
DO117-03											19.82	20.03					14.99	14.93	0				1
DO117-05			23.28	23.19	27.54	27.49											15.33	15.19	0
DO117-06																	14.96	14.87	45
DO118-01			27.37	27.71													14.47	14.45	3
DO118-02																	15.07	14.87	0
DO118-03			21.26	21.82													14.57	14.4	160
DO118-04																	14.44	14.87	0
DO118-05																	15.1	15.07	0
DO118-06																	14.51	14.58	0
DO119-03																	14.37	14.43	0
DO119-04											19.56	20.09					14.89	14.43	0				1
DO120-03																	15.04	14.97	0
DO120-04	29.72	29.56	21.69	21.47	23.57	23.52											15.12	15.05	75
DO120-05																	14.85	14.81	0
DO121-01			22.89	22.48													14.43	14.4	120
DO121-04																	14.93	14.92	0
DO121-05							32.71	31.65									15.02	14.89	0
DO122-02																	14.59	14.52	0
DO122-03																	15	15.03	0
DO123-01																	14.84	15.12	0
DO123-02											19.01	18.95					14.5	14.66	0				1
DO123-03																	15.3	15.19	0
DO124-01																	14.62	14.99	0
DO124-02			33.42	33.87													14.61	14.94	0
DO124-03											20.3	20.48					14.51	14.9	0				1
DO124-04																	14.99	14.51	0
DO124-05																	15.43	15.15	0
DO124-06											20.9	21.01					14.75	14.97	0				1
DO125-02																	14.59	14.96	0
DO126-01											26.7	26.63					14.99	14.45	0
DO126-02																	14.54	14.83	0
DO126-03											15.89	16.28					14.52	14.95	0				1
DO126-04																	15.04	15.18	0
DO126-05																	14.53	14.51	0
DO126-06																	14.64	15.16	0
DO126-07																	14.96	15.02	0
DO127-01			23.24	24.03													14.91	14.88	50
DO127-02																	15.08	15.02	0
DO128-01			29.92	29.22							18.05	17.93					14.9	14.48	0				1
DO129-01																	15.09	15.13	0
DO130-01																	15	15	0
DO130-02			24.87	24.64													15.12	14.98	0
DO131-01			18.28	18.77													14.25	14.18	28
DO131-02			22.72	23.21													14.24	13.52	0
DO131-03																	15.33	14.38	0
DO131-04			26.98	27.08													14.47	14.54	7
DO131-05																	14.6	14.85	0
DO131-06																	15.15	15.28	0
DO132-01																	14.94	14.9	0
DO132-02																	15.1	15.29	0
DO132-04																	14.38	14.4	0
DO132-05																	14.51	14.89	0
DO133-03			23.98	23.01													14.53	14.44	0
DO134-01			33.18	33.52	22.24	21.83											15.03	15.08	8
DO134-02																	14.83	14.43	0
DO134-03					25.41	25.28											14.37	14.64	3
DO134-04					27.06	27.13											14.32	14.38	0
DO134-05			24.65	24.93			32.55	30.57									14.59	15.01	10	1
DO135-01			27.7	27.32													14.64	14.61	21
DO135-02																	14.94	14.94	44		1
DO135-03											24.86	24.29					15.31	15.07	0				1
DO135-04											26.03	25.48					14.44	14.48	0				1
DO136-01			27.81	28.1													14.47	14.43	0
DO136-02			23.51	23.14	19.61	19.72											14.43	14.81	108
DO136-03																	14.48	14.39	0
DO136-04																	14.57	14.48	0
DO137-01																	14.56	14.54	0
DO137-03					17.29	17.35											14.84	14.88	162
DO137-05			34.21	32.89	22.84	23.08											14.91	14.89	75
DO137-06																	14.92	14.96	0
DO137-07																	15.01	14.92	0
DO138-01																	14.52	14.95	0
DO138-02																	15.03	15.02	0
DO138-03					34.29	34.36											14.52	14.61	0
DO138-04																	14.59	15.05	0
DO138-05																	14.93	15.02	0
DO138-06																	15.08	14.59	0
DO138-07																	14.63	14.47	0
DO138-08																	14.92	14.98	0
DO139-01																	14.56	14.66	0
DO139-02																	14.99	15.02	0
DO140-01																	14.54	14.98	0
DO140-02			24.96	25.33													15.27	15.52	0
DO140-03											29.77	30.16					15.26	15.32	0
DO140-04			21.89	22.06							20.99	21.63					15.1	15.26	66				1
DO141-01																	16.21	16.09	0
DO141-03											24.5	24.23					15.48	15.23	0
DO142-01																	15.45	15.17	0
DO142-02			30.17	30.22	29.05	29											14.99	15.33	9
DO142-03			33.98	35.02	21.49	21.53											15.21	15.12	3
DO142-04																	14.53	15.07	0
DO142-05																	15.07	15.23	0
DO142-06			22.05	22.08							20.75	20.74					15.13	15.36	20				1
DO143-01					26.85	26.66											14.6	15.51	0
DO144-02																	15.21	15.76	0				1
DO144-03			25.08	24.83													14.54	15.54	3
DO144-05																	15.42	15.38	0
DO144-06																	15.56	15.16	0
DO145-01																	14.69	15.32	0
H03-01											23.39	23.65					15.23	15.31	0
H03-02(73)																	15.33	15.1	0
H04 (39)																	15.33	15.24	0
H04(46)																	15.23	15.13	0
H05-01			24.36	24.36													15.05	15.3	44
H05-02			24.61	24.85	23.55	23.63											15.58	14.68	50
H05-03			34.45	34.38							26.09	25.94					15.28	15.24	0
H05-04											25.59	25.56					15.05	15.12	0
H07(48)			21.54	21.34							22.63	22.66					16.39	16.26	160				1
H07(70)			23.77	23.1	20.49	20.35					29.22	30.87					15.34	14.58	83	1
H09-01					26.64	26.48											15.6	15.32	0
H09-02																	15.68	15.51	0
H09-03																	16.17	16.32	0
H10-01					22.06	22.19											15.02	15.03	6		1
H10-02					22.43	22.35											14.43	14.96	0
H10-03																	14.36	14.35	0
H13(42)					25.52	25.57											14.35	15.02	12
H13(68)																	15.13	15.25	0
H15																	14.32	15.11	0
H15(23)																	15.14	15.13	0
H17																	15.34	15.5	0
H25-02			25.56	25.54													14.94	14.5	50
H25(33)																	15.2	15.1	0
H25(50)																	15.11	14.08	0
H25(67)																	14.99	14.91	0
H25-03																	14.9	15.14	0
H25(71)			25.84	25.4													15.49	15.92	0
H25(72)																	15.46	15.24	0
H25-01			23.37	23.6													15.16	15.06	0
H27					24.36	24.22											15.17	15.17	0
H27(44)											26.25	26.33					14.86	15.3	0
H32-01																	15.04	15.27	28		1
H32-02																	14.49	15.19	36		1
H34																	14.44	15.17	0
H34(45)																	15.22	15.4	0
H35																	15.21	15.5	0
H35-01											31.64	32.51					14.47	14.19	0
H35-02																	14.02	14.35	0
H35-03																	14.22	14.94	0
H35-04																	14.36	14.41	0
H35-05																	14.71	14.83	0
H35-06																	14.31	14.35	0
H36			22.11	22	20.51	20.6											14.13	13.99	344
H36(28)			32.09	31.9	22.09	22.3					28.2	28.25					14.54	14.41	0
